# Supplementary material for: Biodiversity Areas under Threat: Overlap of Climate Change and Population Pressures on the World’s Biodiversity Priorities
Source: PLoS One. 2017 Jan 26;12(1):e0170615. doi: 10.1371/journal.pone.0170615 (PMC5268772; doi:10.1371/journal.pone.0170615)
Supplement: S1 File — (XLSX) [file pone.0170615.s001.xlsx]

## Sheet: Biomes by Realm
Realm	BIOME	Biome Names	Total Area	% area drying	% area wetting	area drying	area wetting	% pop change	count pop diff	Count pop per area
Australasia	1	Tropical & Subtropical Moist Broadleaf Forests	1.15279e+06	0.0604335	0.264414	69667	304813	0.552002	1.05229e+07	9.12819
Australasia	2	Tropical & Subtropical Dry Broadleaf Forests	87792.1	0.0146343	0.214614	1284.78	18841.4	0.37526	2.73707e+06	31.1767
Australasia	4	Temperate Broadleaf & Mixed Forests	735230	0.0528605	0.138476	38864.6	101812	0.289328	4.14508e+06	5.63779
Australasia	7	Tropical & Subtropical Grasslands, Savannas & Shrublands	2.15915e+06	4.311e-05	0.559188	93.0809	1.20737e+06	0.464589	343055	0.158884
Australasia	8	Temperate Grasslands, Savannas & Shrublands	629108	0.00515239	0.134149	3241.41	84394.3	0.155955	154127	0.244993
Australasia	10	Montane Grasslands & Shrublands	67508.5	0.0798246	0.371962	5388.84	25110.6	0.820713	152695	2.26186
Australasia	12	Mediterranean Forests, Woodlands & Scrub	803178	0.123656	0.000122283	99317.7	98.2153	0.252317	715888	0.891319
Australasia	13	Deserts & Xeric Shrublands	3.56518e+06	0.00079725	0.0467175	2842.33	166556	0.220198	52186.9	0.014638
Australasia	14	Mangroves	26708.2	0.00169541	0.367415	45.2815	9813	1.00439	43726	1.63717
Afrotropic	1	Tropical & Subtropical Moist Broadleaf Forests	3.47081e+06	0.0592171	0.05956	205532	206722	0.920051	1.21944e+08	35.1342
Afrotropic	2	Tropical & Subtropical Dry Broadleaf Forests	194197	0.055118	0.0928402	10703.7	18029.3	0.867608	1.5287e+06	7.87191
Afrotropic	7	Tropical & Subtropical Grasslands, Savannas & Shrublands	1.39269e+07	0.0313822	0.308193	437056	4.29217e+06	0.890821	2.486e+08	17.8504
Afrotropic	8	Temperate Grasslands, Savannas & Shrublands	25722.2	0.00224957	0	57.8639	0	1.24461	440993	17.1444
Afrotropic	9	Flooded Grasslands & Savannas	456066	0.00161397	0.383642	736.078	174966	0.800631	4.63282e+06	10.1582
Afrotropic	10	Montane Grasslands & Shrublands	859950	0.0218329	0.274246	18775.2	235838	0.654467	3.65546e+07	42.5078
Afrotropic	12	Mediterranean Forests, Woodlands & Scrub	95607.5	0.170338	0.0322357	16285.6	3081.98	0.0812419	353089	3.69311
Afrotropic	13	Deserts & Xeric Shrublands	2.3967e+06	0.0169061	0.292162	40518.8	700222	1.26989	3.22601e+07	13.4603
Afrotropic	14	Mangroves	76403	0.0781897	0.181632	5973.93	13877.2	0.867678	7.19267e+06	94.1413
IndoMalay	1	Tropical & Subtropical Moist Broadleaf Forests	5.39379e+06	0.0100964	0.330947	54458	1.78506e+06	0.428276	4.81095e+08	89.1943
IndoMalay	2	Tropical & Subtropical Dry Broadleaf Forests	1.52372e+06	0.000259296	0.587856	395.096	895730	0.41572	1.20946e+08	79.3752
IndoMalay	3	Tropical & Subtropical Coniferous Forests	95611.4	0.216286	0.156442	20679.4	14957.7	0.655853	8.86445e+06	92.7133
IndoMalay	4	Temperate Broadleaf & Mixed Forests	149449	0.179198	0.196461	26780.9	29360.9	0.691332	9.25287e+06	61.9132
IndoMalay	5	Temperate Conifer Forests	67085.9	0.110452	0.219668	7409.75	14736.7	0.829829	6.53189e+06	97.366
IndoMalay	7	Tropical & Subtropical Grasslands, Savannas & Shrublands	34523.5	0.000547514	0.180454	18.9021	6229.93	0.735505	7.89081e+06	228.563
IndoMalay	9	Flooded Grasslands & Savannas	27838.7	0	0.909062	0	25307.1	0.558	127124	4.56643
IndoMalay	10	Montane Grasslands & Shrublands	4320.05	0	0.136188	0	588.341	1.2068	162711	37.6642
IndoMalay	13	Deserts & Xeric Shrublands	1.08434e+06	0.0214714	0.332338	23282.2	360366	0.590887	1.32002e+08	121.735
IndoMalay	14	Mangroves	118421	0.00608686	0.299866	720.813	35510.5	0.496041	1.84854e+07	156.099
Nearctic	2	Tropical & Subtropical Dry Broadleaf Forests	50902.6	0.0218338	0.00176712	1111.4	89.9509	0.222464	258962	5.0874
Nearctic	3	Tropical & Subtropical Coniferous Forests	287870	0.061388	0.131414	17671.8	37830.1	0.269284	1.04154e+06	3.6181
Nearctic	4	Temperate Broadleaf & Mixed Forests	2.83167e+06	0.0594893	0.115268	168454	326401	0.173636	2.54517e+07	8.98821
Nearctic	5	Temperate Conifer Forests	1.56433e+06	0.0378501	0.0408007	59209.9	63825.6	0.375559	1.19628e+07	7.64724
Nearctic	7	Tropical & Subtropical Grasslands, Savannas & Shrublands	80514.6	0.0816153	0.00732387	6571.22	589.678	0.400235	2.19986e+06	27.3225
Nearctic	8	Temperate Grasslands, Savannas & Shrublands	2.55153e+06	0.141835	0.0664922	361896	169657	0.2657	1.2525e+07	4.9088
Nearctic	12	Mediterranean Forests, Woodlands & Scrub	121281	0.0500801	0.000317967	6073.77	38.5635	0.469012	1.12929e+07	93.1134
Nearctic	13	Deserts & Xeric Shrublands	2.31897e+06	0.0180205	0.0462868	41789	107338	0.48401	1.93173e+07	8.33013
Neotropic	1	Tropical & Subtropical Moist Broadleaf Forests	9.22023e+06	0.0423098	0.196545	390106	1.81219e+06	0.429474	7.80403e+07	8.46403
Neotropic	2	Tropical & Subtropical Dry Broadleaf Forests	1.13828e+06	0.062856	0.137363	71547.8	156358	0.439998	2.11511e+07	18.5816
Neotropic	3	Tropical & Subtropical Coniferous Forests	325810	0.101308	0.229089	33007.2	74639.4	0.608989	1.76827e+07	54.2731
Neotropic	4	Temperate Broadleaf & Mixed Forests	305081	0.126249	0.219361	38516.2	66922.8	0.250061	1.339e+06	4.389
Neotropic	7	Tropical & Subtropical Grasslands, Savannas & Shrublands	3.97313e+06	0.101609	0.0503548	403704	200066	0.506824	1.99901e+07	5.03132
Neotropic	8	Temperate Grasslands, Savannas & Shrublands	1.53667e+06	0.0234352	0.0510929	36012.3	78513.2	0.25081	5.93582e+06	3.86277
Neotropic	9	Flooded Grasslands & Savannas	269680	0.151631	0.0410455	40892	11069.1	0.568143	2.46359e+06	9.13524
Neotropic	10	Montane Grasslands & Shrublands	870596	0.0111392	0.176442	9697.72	153610	0.455193	5.04037e+06	5.78956
Neotropic	12	Mediterranean Forests, Woodlands & Scrub	148381	0.0863934	0	12819.2	0	0.490149	2.81486e+06	18.9705
Neotropic	13	Deserts & Xeric Shrublands	1.17169e+06	0.111726	0.123782	130908	145033	0.332859	1.48889e+07	12.7072
Neotropic	14	Mangroves	124899	0.0822153	0.228386	10268.6	28525.2	0.391442	3.92602e+06	31.4336
Palearctic	1	Tropical & Subtropical Moist Broadleaf Forests	508986	0.000406462	0.00380516	206.884	1936.78	0.125898	1.05087e+07	20.6463
Palearctic	4	Temperate Broadleaf & Mixed Forests	5.59716e+06	0.0368294	0.172826	206140	967337	0.14052	1.615e+08	28.8539
Palearctic	5	Temperate Conifer Forests	1.0721e+06	0.0267018	0.203617	28627	218298	0.583067	3.07209e+07	28.6548
Palearctic	8	Temperate Grasslands, Savannas & Shrublands	2.89482e+06	0.113353	0.0795684	328137	230336	0.185724	2.15988e+07	7.4612
Palearctic	9	Flooded Grasslands & Savannas	307733	0.0679129	0.0347973	20899.1	10708.3	0.486294	2.77644e+07	90.2223
Palearctic	10	Montane Grasslands & Shrublands	3.29313e+06	0.0210012	0.389804	69159.7	1.28368e+06	0.377281	1.55711e+07	4.72834
Palearctic	12	Mediterranean Forests, Woodlands & Scrub	2.05193e+06	0.00434341	0.167299	8912.4	343287	0.284285	5.32062e+07	25.9298
Palearctic	13	Deserts & Xeric Shrublands	1.72798e+07	0.0015802	0.027037	27305.5	467193	0.738245	1.02536e+08	5.93387

## Sheet: Hotspots
NAME	Area no change	Area drying	Area Wetting	total area	% drying	% wetting	% pop change	count pop diff	count pop per area
Atlantic Forest	1.12021e+06	32850.1	77689	1.23074e+06	0.0266912	0.0631236	0.337329	2.89835e+07	23.5496
California Floristic Province	277215	16704.6	42.4377	293962	0.0568257	0.000144364	0.473655	1.41122e+07	48.0067
Cape Floristic Region	60128.4	16312.6	2080.86	78521.9	0.207746	0.0265004	0.103616	353339	4.49989
Caribbean Islands	170211	4103.86	54591.5	228906	0.0179281	0.238489	0.293677	8.63457e+06	37.721
Caucasus	451165	15352.5	67006.7	533525	0.0287756	0.125592	0.130409	4.38314e+06	8.21544
Cerrado	1.87978e+06	98081	46958.7	2.02482e+06	0.0484393	0.0231915	0.459351	9.88518e+06	4.882
Chilean Winter Rainfall and Valdivian Forests	300513	49781	47028.8	397323	0.125291	0.118364	0.372156	4.16507e+06	10.4829
Coastal Forests of Eastern Africa	228958	38229.6	22979	290167	0.131751	0.0791925	0.934576	1.07328e+07	36.9885
East Melanesian Islands	83863.2	11602.1	3526.08	98991.4	0.117203	0.03562	0.923257	911672	9.2096
Eastern Afromontane	798454	47325.6	167856	1.01364e+06	0.046689	0.165598	0.96535	6.87283e+07	67.8038
Forests of East Australia	189452	1352.01	63583.8	254388	0.00531477	0.249948	0.354218	2.46941e+06	9.70723
Guinean Forests of West Africa	561284	20691.6	35683.7	617659	0.0335	0.0577725	0.897723	5.17498e+07	83.7837
Himalaya	470807	110187	159813	740808	0.148739	0.215729	0.628884	4.70055e+07	63.4516
Horn of Africa	1.22707e+06	278506	147135	1.65271e+06	0.168515	0.0890265	1.15395	2.86154e+07	17.3142
Indo-Burma	1.32559e+06	29675.5	1.01052e+06	2.36579e+06	0.0125436	0.42714	0.506747	1.31702e+08	55.6693
Irano-Anatolian	592020	99059.8	208853	899932	0.110075	0.232076	0.410008	2.02139e+07	22.4615
Japan	318773	580.109	54312.1	373665	0.00155248	0.14535	0.0361535	4.21498e+06	11.2801
Madagascar and the Indian Ocean Islands	520359	22468.5	55867.5	598695	0.0375291	0.0933154	0.941037	1.31721e+07	22.0014
Madrean Pine-Oak Woodlands	339807	27219.8	93181.6	460208	0.0591468	0.202477	0.480857	9.03708e+06	19.6369
Maputaland-Pondoland-Albany	226341	16011.5	29725.9	272078	0.0588488	0.109255	0.301064	4.69432e+06	17.2535
Mediterranean Basin	1.72715e+06	8888.82	350179	2.08622e+06	0.00426073	0.167854	0.284678	5.25335e+07	25.1812
Mesoamerica	802629	121350	202314	1.12629e+06	0.107743	0.179628	0.536601	3.21216e+07	28.5197
Mountains of Central Asia	579492	40892	244177	864561	0.047298	0.282429	0.361886	1.13754e+07	13.1574
Mountains of Southwest China	215655	12.0291	46462.2	262129	4.58899e-05	0.177249	2.11506	2.15816e+07	82.3318
New Caledonia	18858.7	0	61.4483	18920.2	0	0.00324776	0.650187	88562.9	4.68087
New Zealand	192040	13358.2	64402	269800	0.0495115	0.238703	0.233787	741252	2.74742
Philippines	150939	0	145091	296030	0	0.490122	0.570005	3.2352e+07	109.286
Polynesia-Micronesia	39852.9	5617.24	1632.16	47102.3	0.119256	0.0346514	0.364901	822212	17.4559
Southwest Australia	260306	96134.2	0	356440	0.269707	0	0.390132	537391	1.50766
Succulent Karoo	101930	479.331	176.875	102586	0.00467247	0.00172416	0.276125	73469.4	0.716172
Sundaland	986853	5402.22	502181	1.49444e+06	0.00361488	0.336034	0.380034	6.73802e+07	45.0873
Tropical Andes	1.13031e+06	44901.4	361956	1.53717e+06	0.0292104	0.235469	0.483164	2.36617e+07	15.393
Tumbes-Choco-Magdalena	224019	1058.79	48321.7	273400	0.00387269	0.176744	0.517265	5.34803e+06	19.5612
Wallacea	220553	7121.03	109350	337024	0.0211292	0.324457	0.403866	8.25809e+06	24.503
Western Ghats and Sri Lanka	40161.7	0	148726	188888	0	0.787378	0.300243	1.45868e+07	77.2244

## Sheet: G200
REALM	BIOME	G200_REGIO	area no change	area drying	area wetting	total area	%drying	%wetting
AT	1	Albertine Rift Montane Forests	92760.7	10487.8	155.016	103404	0.101426	0.00149914
PA	5	Altai-Sayan montane forests	108056	27.3703	3379.7	111463	0.000245556	0.0303213
PA	10	Altai-Sayan montane forests	76406.1	213.93	2967.92	79587.9	0.00268797	0.0372911
PA	13	Altai-Sayan montane forests	119123	0	885.259	120009	0	0.00737662
NT	1	Amazon River and Flooded Forests	341515	37304.2	173126	551945	0.0675867	0.313665
NT	14	Amazon-Orinoco-Southern Caribbean mangroves	29330.1	5346.65	6217.61	40894.4	0.130743	0.152041
IM	1	Annamite Range moist forests	29597.3	0	63768.8	93366.1	0	0.682997
NA	4	Appalachian and Mixed Mesophytic forests	331967	142.583	19496.6	351606	0.00040552	0.05545
AT	8	Arabian Highlands woodlands and shrublands	25427.7	57.8639	0	25485.6	0.00227046	0
AT	13	Arabian Highlands woodlands and shrublands	440868	1919.22	295.269	443083	0.00433151	0.000666396
NT	13	Atacama-Sechura Deserts	203784	180.496	85152.1	289117	0.000624302	0.294525
NT	2	Atlantic Dry Forests	107139	6680.33	840.621	114660	0.0582621	0.00733142
NT	1	Atlantic Forests	1.08714e+06	30787.2	76509.5	1.19443e+06	0.0257755	0.0640551
NT	7	Atlantic Forests	24640.6	1658.06	14.3155	26313	0.063013	0.000544048
IM	1	Borneo lowland and montane forests	465378	2275.38	73007.5	540661	0.00420851	0.135034
NA	12	California chaparral and woodlands	115169	6073.77	38.5635	121281	0.0500801	0.000317967
AT	1	Cameroon Highlands forests	38772.7	144.35	103.555	39020.6	0.00369934	0.00265385
IM	1	Cardamom Mountains moist forests	33843	1329.64	8901.63	44074.3	0.0301681	0.201969
AA	13	Carnavon xeric shrubs	235752	50.4209	33796.9	269599	0.000187022	0.12536
PA	4	Caucasus-Anatolian-Hyrcanian temperate forests	227884	15157	57140.4	300182	0.0504926	0.190353
PA	5	Caucasus-Anatolian-Hyrcanian temperate forests	121701	3609.34	39387.2	164697	0.021915	0.239149
PA	10	Caucasus-Anatolian-Hyrcanian temperate forests	40009.4	0	18308.9	58318.3	0	0.313947
AT	7	Central and Eastern Miombo woodlands	1.51705e+06	91388.2	316452	1.92489e+06	0.0474772	0.164401
NT	10	Central Andean Dry Puna	207956	0	46973.7	254930	0	0.184261
NT	1	Central Andean Yungas	203821	24839.5	122682	351343	0.0706988	0.349181
PA	13	Central Asian deserts	1.25176e+06	0	68268.3	1.32003e+06	0	0.0517173
AT	1	Central Congo Basin moist forests	483327	21848.8	21.056	505197	0.0432482	4.16788e-05
AA	10	Central Range subalpine grasslands	6193.1	1764.84	7544.8	15502.7	0.11384	0.486675
NT	7	Cerrado Woodlands and Savannas	1.77251e+06	91401.9	46123.8	1.91004e+06	0.0478534	0.0241481
IM	2	Chhota-Nagpur dry forests	110829	395.096	10909.4	122134	0.00323494	0.0893233
NA	13	Chihuahuan-Tehuacán Deserts	531689	23925.6	78252.3	633867	0.0377454	0.123452
NT	13	Chihuahuan-Tehuacán Deserts	1064.66	0	8797.12	9861.78	0	0.892042
NT	12	Chilean Matorral	135562	12819.2	0	148381	0.0863934	0
NT	2	Chiquitano Dry Forests	198311	25723	5732.96	229767	0.111953	0.0249512
NT	1	Chocó-Darién Moist Forests	147817	942.259	37971.6	186731	0.00504609	0.203349
NT	1	Coastal Venezuela Montane Forests	12420.6	1297.87	563.198	14281.6	0.0908768	0.0394351
AT	1	Congolian Coastal Forests	205333	13561.7	22798.4	241693	0.0561114	0.0943278
PA	8	Daurian/Mongolian steppe	679125	290679	2530.32	972334	0.29895	0.00260231
AT	10	Drakensberg Montane Woodlands and Grasslands	151536	6346.74	44078.5	201962	0.0314255	0.218252
AT	7	East African Acacia Savannas	493803	28875.7	46520.1	569199	0.0507305	0.0817292
AT	1	East African coastal forests	76139.7	36010.9	0	112151	0.321094	0
AT	14	East African Mangroves	12784.3	2206.46	1021.52	16012.3	0.137798	0.0637964
AT	10	East African Moorlands	4453.37	1396	85.2419	5934.61	0.23523	0.0143635
AT	1	Eastern Arc Montane Forests	20032.5	3523.52	0	23556.1	0.14958	0
AA	4	Eastern Asutralia Temperate Forests	438528	26656.5	47191.5	512376	0.0520252	0.0921032
AA	10	Eastern Asutralia Temperate Forests	8383.56	3592.61	23.2594	11999.4	0.299398	0.00193838
IM	1	Eastern Deccan plateau moist forests	181966	0	158205	340171	0	0.465074
PA	10	Eastern Himalayan alpine meadows	72211.4	3637.99	45164.5	121014	0.0300626	0.373217
IM	4	Eastern Himalayan broadleaf and conifer forests	67509.6	1543.44	24571.2	93624.3	0.0164854	0.262445
IM	5	Eastern Himalayan broadleaf and conifer forests	16930.6	2520.51	7984.69	27435.9	0.0918693	0.291031
PA	5	Eastern Himalayan broadleaf and conifer forests	31825.6	0	14394.6	46220.2	0	0.311435
AT	10	Ethiopian Highlands	169051	9748.6	90598.4	269398	0.0361866	0.336299
PA	4	European-Mediterranean montane forests	122695	764.599	38804.1	162263	0.00471209	0.239143
PA	5	European-Mediterranean montane forests	209499	13949.9	74123.3	297572	0.0468792	0.249094
NT	9	Everglades Flooded Grasslands	17502	0	2526.36	20028.3	0	0.126139
AT	12	Fynbos	60150.7	16285.6	2087.7	78524	0.207397	0.0265868
NT	13	Galápagos Islands Scrub	7978.25	0	0	7978.25	0	0
AA	13	Great Sandy-Tanami-Central Ranges desert	1.1425e+06	1804.05	113033	1.25734e+06	0.00143481	0.0898985
NT	1	Greater Antillean Moist Forests	54376.2	3407.42	25142.9	82926.5	0.0410897	0.303195
NT	3	Greater Antillean Pine Forests	15361.1	365.735	2237.96	17964.8	0.0203584	0.124575
IM	14	Greater Sundas mangroves	25429.8	320.969	11529	37279.8	0.00860973	0.309257
NT	1	Guianan Highlands Moist Forests	378433	1904.22	46134.8	426472	0.00446505	0.108178
NT	1	Guianan Moist Forests	424154	9251.08	78467	511872	0.018073	0.153294
AT	1	Guinean Moist Forests	378205	18786.7	27052.5	424045	0.0443036	0.0637964
AT	14	Gulf of Guinea Mangroves	27199.1	0	3592.05	30791.2	0	0.116659
OC	2	Hawaii dry forest	4704.21	1910.23	0	6614.44	0.288797	0
OC	7	Hawaii dry forest	2230.63	1134.48	0	3365.11	0.337131	0
OC	1	Hawaii moist forest	5577.89	1139.65	0	6717.54	0.169652	0
PA	5	Hengduan Shan conifer forests	215646	10.0642	46467.4	262124	3.83948e-05	0.177273
AT	7	Horn of Africa Acacia Savannas	670360	264870	114071	1.0493e+06	0.252426	0.108712
IM	2	Indochina dry forests	144993	0	297728	442721	0	0.672495
PA	6	Kamchatka taiga and grasslands	732.108	2062.77	0	2794.88	0.738054	0
IM	1	Kayah-Karen/Tenasserim moist forests	121709	14.8971	94363.9	216088	6.89402e-05	0.436692
IM	10	Kinabalu montane shrublands	3731.71	0	588.341	4320.05	0	0.136188
NA	5	Klamath-Siskiyou coniferous forests	50257.2	112.611	0	50369.9	0.00223568	0
NT	7	Llanos Savannas	335538	38575	1673.52	375787	0.102651	0.00445339
AA	1	Lord Howe and Norfolk Island Forests	55.9245	0	0	55.9245	0	0
AT	2	Madagascar Dry Forests	140860	10703.7	0	151564	0.0706219	0
AT	1	Madagascar Forests and Shrublands	272416	11109.8	27206.8	310732	0.0357536	0.0875572
AT	10	Madagascar Forests and Shrublands	1273.47	0	0	1273.47	0	0
AT	14	Madagascar Mangroves	5146.34	18.9549	22.7706	5188.07	0.00365355	0.00438902
AT	13	Madagascar Spiny Thicket	94685.8	0	28105	122791	0	0.228886
PA	4	Mediterranean Forests, Woodlands and Scrub	155749	15.9572	28169.8	183934	8.67549e-05	0.153151
PA	8	Mediterranean Forests, Woodlands and Scrub	23810.3	0	1123.91	24934.2	0	0.0450749
PA	10	Mediterranean Forests, Woodlands and Scrub	5893.52	0	434.126	6327.65	0	0.0686078
PA	12	Mediterranean Forests, Woodlands and Scrub	1.69974e+06	8912.4	343287	2.05193e+06	0.00434341	0.167299
NT	1	Mesoamerican Pine-Oak Forests	12270.3	427.171	2630.29	15327.8	0.0278691	0.171603
NT	3	Mesoamerican Pine-Oak Forests	193923	13918	70397.4	278239	0.0500216	0.253011
PA	5	Middle Asian montane woodlands and steppe	19476.9	109.225	7981.93	27568	0.00396203	0.289536
PA	8	Middle Asian montane woodlands and steppe	274315	29425.7	121375	425116	0.0692181	0.285511
PA	10	Middle Asian montane woodlands and steppe	287787	10992.6	128140	426919	0.0257488	0.30015
AA	1	Moluccas moist forests	17048.6	66.3016	28905.5	46020.4	0.0014407	0.628101
IM	1	Naga-Manapuri-Chin Hills moist forests	227987	187.25	32090.5	260265	0.000719461	0.123299
IM	3	Naga-Manapuri-Chin Hills moist forests	9682.71	0	2.79507	9685.5	0	0.000288582
AT	13	Namib-Karoo-Kaokoveld Deserts and Shrublands	672015	622.982	131848	804486	0.000774385	0.163891
IM	1	Nansei Shoto Archipelago Forests	3986.24	0	77.3511	4063.6	0	0.0190351
NT	1	Napo Moist Forests	255203	36787.7	73042.8	365034	0.100779	0.200099
AA	2	New Caledonia dry forests	4408.35	0	0	4408.35	0	0
AA	1	New Caledonia moist forests	14455	0	67.7973	14522.8	0	0.00466834
AA	14	New Guinea mangroves	16850	45.2815	9813	26708.3	0.00169541	0.367415
AA	1	New Guinea montane forests	212942	27430.3	46191.5	286564	0.0957213	0.161191
AA	4	New Zealand Temperate Forests	129195	12208.2	28902.9	170306	0.0716836	0.169712
IM	1	North Indochina subtropical moist forests	361337	26206.7	48325.9	435869	0.0601252	0.110873
PA	1	North Indochina subtropical moist forests	239549	133.825	171.218	239854	0.000557943	0.00071384
AT	1	Northeastern Congo Basin moist forests	492167	19218.1	19682.2	531068	0.0361878	0.0370615
NT	1	Northern Andean Montane Forests	347232	8955.46	64806.1	420994	0.0212722	0.153936
NT	10	Northern Andean Páramo	37215.8	540.341	8210.3	45966.5	0.0117551	0.178615
AA	7	Northern Australia and Trans-Fly savannas	459117	0	674094	1.13321e+06	0	0.594853
NA	8	Northern Prairies	500677	1125.09	121965	623767	0.00180371	0.19553
AA	2	Nusu Tenggara dry forests	53690.9	130.692	18841.4	72663	0.00179861	0.259299
NA	5	Pacific temperate rainforests	97573.9	2703.42	5758.73	106036	0.0254953	0.0543092
IM	1	Palawan moist forests	10073.6	0	4204.83	14278.4	0	0.294489
NT	9	Pantanal Flooded Savannas	153064	16023.4	1413.74	170501	0.093978	0.00829164
NT	8	Patagonian Steppe	459913	11976.4	13856.1	485745	0.0246556	0.0285254
IM	1	Peninsular Malaysia lowland and montane forests	71008.8	0	71032.8	142042	0	0.500085
IM	1	Philippines moist forests	134802	0	136070	270871	0	0.502341
IM	3	Philippines moist forests	4538.96	0	2513.49	7052.45	0	0.3564
AA	1	Queensland Tropical Forests	8835.9	0	23759.8	32595.7	0	0.728924
IM	9	Rann of Kutch flooded grasslands	2531.61	0	25307.1	27838.7	0	0.909062
NT	1	Rio Negro-Juruá Moist Forests	619416	28517.3	171732	819666	0.0347913	0.209515
PA	4	Russian Far East broadleaf and mixed forests	183803	16891	3003.05	203697	0.0829221	0.0147428
AT	1	Seychelles and Mascarenes Moist Forests	4544.79	591.317	105.409	5241.52	0.112814	0.0201103
AT	13	Seychelles and Mascarenes Moist Forests	159.481	0	0	159.481	0	0
NA	3	Sierra Madre Oriental and Occidental pine-oak forests	232359	17671.8	37799.9	287830	0.0613964	0.131327
NT	3	Sierra Madre Oriental and Occidental pine-oak forests	379.438	681.636	0	1061.07	0.642402	0
NA	5	Sierra Nevada Coniferous Forests	46721.7	6149.91	0	52871.6	0.116318	0
AT	13	Socotra Island Desert	3803.24	0	0	3803.24	0	0
AA	1	Solomons-Vanuatu-Bismarck moist forests	81864.3	10542.2	3445.47	95851.9	0.109984	0.0359457
NA	13	Sonoran-Baja Deserts	317644	3522.18	2803.42	323970	0.0108719	0.00865333
NT	13	Sonoran-Baja Deserts	3738.18	129.077	0	3867.25	0.0333768	0
NT	14	South American Pacific mangroves	8641.3	116.46	4703.16	13460.9	0.00865175	0.349394
IM	1	Southeast China-Hainan moist forests	602047	0	299458	901504	0	0.332175
NA	4	Southeastern conifer and broadleaf forests	305310	22051.7	20362.1	347724	0.0634172	0.0585583
NA	5	Southeastern conifer and broadleaf forests	195233	8599.48	32519.4	236352	0.0363842	0.137589
AA	12	Southern Australia Mallee and Woodlands	307473	2505.07	98.2153	310076	0.00807888	0.000316746
NA	2	Southern Mexican dry forests	49701.3	1111.4	89.9509	50902.6	0.0218338	0.00176712
NT	2	Southern Mexican Dry Forests	191783	21001.8	50488	263273	0.0797723	0.191771
AA	1	Southern New Guinea lowland forests	132306	3692.1	63399	199398	0.0185163	0.317953
OC	1	Southern Pacific Islands forests	17021.6	1225.83	1335.98	19583.4	0.0625953	0.0682199
OC	2	Southern Pacific Islands forests	6877.4	0	12.4087	6889.81	0	0.00180102
AT	10	Southern Rift Montane Woodlands	33347.8	0	12.577	33360.4	0	0.000377005
PA	4	Southwest China temperate forests	385553	133.633	3770.14	389457	0.000343128	0.00968051
NT	1	Southwestern Amazonian Moist Forests	1.46488e+06	123691	289523	1.87809e+06	0.06586	0.154158
AA	12	Southwestern Australia Forests and Scrub	396289	96812.6	0	493102	0.196334	0
IM	1	Southwestern Ghats moist forest	16481.9	0	29738.8	46220.7	0	0.643409
IM	1	Sri Lankan moist forest	1894.05	0	13671.8	15565.8	0	0.87832
AT	7	Sudanian savannas	760610	5705.14	147389	913705	0.00624396	0.16131
AT	9	Sudd-Sahelian flooded grasslands and savannas	172513	705.302	70362.2	243581	0.00289556	0.288866
AA	1	Sulawesi moist forests	127336	5229.97	58716.7	191282	0.0273416	0.306964
IM	1	Sumatran Islands lowland and montane forests	128250	0	202656	330906	0	0.612427
IM	3	Sumatran Islands lowland and montane forests	2369.73	0	378.291	2748.02	0	0.13766
IM	14	Sundarbans mangroves	20378.9	3.99159	0	20382.9	0.00019583	0
IM	1	Taiwan montane forests	20997	198.087	14697.4	35892.5	0.00551891	0.409483
NT	1	Talamancan-Isthmian Pacific Forests	14891	950.335	433.069	16274.4	0.0583943	0.0266104
AA	4	Tasmanian Temperate Rainforests	25975.8	0	24071.2	50046.9	0	0.480972
IM	7	Terai-Duar savannas and grasslands	28274.7	18.9021	6229.93	34523.5	0.000547514	0.180454
PA	10	Tibetan Plateau steppe	704803	15133.9	844444	1.56438e+06	0.00967403	0.539794
NT	2	Tumbesian-Andean Valleys Dry Forests	88319	2581.53	11831.2	102732	0.0251289	0.115166
NT	4	Valdivian Temperate Rain Forests / Juan Fernández Islands	164798	36961.1	46784.7	248544	0.148711	0.188235
AT	1	Western Congo Basin moist forests	510495	40832.9	8921.74	560250	0.0728834	0.0159246
IM	4	Western Himalayan temperate forests	25797.7	25237.5	4789.67	55824.9	0.452083	0.0857981
IM	5	Western Himalayan temperate forests	28008.9	4889.24	6751.96	39650	0.12331	0.170289
IM	1	Western Java montane forests	15494.7	0	10676.1	26170.8	0	0.407939
AT	9	Zambezian Flooded Savannas	79015.5	30.7759	73831.9	152878	0.00020131	0.482946
